# Supplementary material for: Breathing Room: Industrial Zoning and Asthma Incidence Using School District Health Records in the City of Santa Ana, California
Source: MDPI journal article supplement (doi:10.3390/ijerph19084820), 2022-04-15
Supplement: s1 [file ijerph-1644727-SI.pdf › ijerph-1644727-SI.pdf]

Table S1. Sensitivity analysis among full sample.

| Outcome                            | Prevalence                    | Distance to Industrial Zone (Tertiles) |                       |                          |                       | Distance to Freeways (Tertiles) |                       |                      |                       |
|------------------------------------|-------------------------------|----------------------------------------|-----------------------|--------------------------|-----------------------|---------------------------------|-----------------------|----------------------|-----------------------|
|                                    |                               | Closest (<0.5 km)                      | <i>p</i> -Value       | Middle (0.5–1.0 km)      | <i>p</i> -Value       | Closest (<1.5 km)               | <i>p</i> -Value       | Middle (1.5–3.0 km)  | <i>p</i> -Value       |
|                                    | <i>n</i> (%)                  | aOR (95% CI)                           |                       | aOR (95% CI)             |                       | aOR (95% CI)                    |                       | aOR (95% CI)         |                       |
| All students (n = 44,641)          |                               |                                        |                       |                          |                       |                                 |                       |                      |                       |
| <b>Asthma diagnosis</b>            | 2987/44,641 (6.7%)            | <b>1.21 (1.09, 1.34)</b>               | <b>&lt;0.001</b>      | <b>1.20 (1.09, 1.33)</b> | <b>&lt;0.001</b>      | <b>1.17 (1.03, 1.34)</b>        | <b>0.019</b>          | 1.03 (0.92, 1.15)    | 0.637                 |
| Presumed asthma diagnosis          | 3173/44,641 (7.1%)            | <b>1.16 (1.05, 1.28)</b>               | <b>0.003</b>          | <b>1.19 (1.08, 1.31)</b> | <b>&lt;0.001</b>      | 1.13 (0.99, 1.28)               | 0.073                 | 1.02 (0.92, 1.14)    | 0.699                 |
| Among those with asthma diagnosis* |                               |                                        |                       |                          |                       |                                 |                       |                      |                       |
| Overweight or obese                | 480/823 (58.3%)               | 1.19 (0.80, 1.78)                      | 0.389                 | 1.46 (1.00, 2.13)        | 0.052                 | 0.64 (0.38, 1.07)               | 0.089                 | 0.87 (0.57, 1.33)    | 0.52                  |
| Failed aerobic fitness test        | 404/809 (49.9%)               | 1.28 (0.86, 1.90)                      | 0.231                 | 1.19 (0.82, 1.73)        | 0.361                 | 1.17 (0.70, 1.95)               | 0.556                 | 0.83 (0.55, 1.25)    | 0.369                 |
| Failed SB math test                | 1215/1667 (72.8%)             | 1.00 (0.74, 1.36)                      | 0.992                 | 1.25 (0.94, 1.68)        | 0.13                  | 0.81 (0.54, 1.20)               | 0.289                 | 0.83 (0.60, 1.17)    | 0.295                 |
| Failed SB ELA test                 | 1137/1,672 (68.0%)            | 1.05 (0.78, 1.41)                      | 0.747                 | 1.17 (0.88, 1.54)        | 0.277                 | 0.68 (0.47, 1.00)               | 0.051                 | 0.79 (0.57, 1.09)    | 0.157                 |
|                                    | <b><i>n</i> (Median, IQR)</b> | <b>Coef (95% CI)</b>                   | <b><i>p</i>-Value</b> | <b>Coef (95% CI)</b>     | <b><i>p</i>-Value</b> | <b>Coef (95% CI)</b>            | <b><i>p</i>-Value</b> | <b>Coef (95% CI)</b> | <b><i>p</i>-Value</b> |
| Among those with asthma diagnosis* |                               |                                        |                       |                          |                       |                                 |                       |                      |                       |
| Total absences                     | 2,757 (3, 1–7)                | –0.18 (–0.85, 0.49)                    | 0.6                   | –0.15 (–0.78, 0.49)      | 0.654                 | –0.11 (–0.98, 0.75)             | 0.798                 | 0.36 (–0.36, 1.08)   | 0.325                 |
| Health-related absences            | 2,757 (4, 1–9)                | –0.14 (–1.07, 0.79)                    | 0.772                 | –0.23 (–1.11, 0.65)      | 0.604                 | –0.61 (–1.81, 0.59)             | 0.317                 | 0.30 (–0.69, 1.30)   | 0.548                 |

\* Sample sizes differ due to incomplete data and/or test eligibility (some tests administered only to certain grades).
